# Supplementary material for: Conductive carbon embedded beneath cathode active material for longevity of solid-state batteries
Source: Royal Society of Chemistry journal article supplement (doi:10.1039/d4ta00674g), 2024-01-01
Supplement: d4ta00674g1.pdf [file d4ta00674g1.pdf]

## Supplementary Information

### Conductive carbon embedded beneath cathode active material for longevity of solid-state batteries

Young-Woon Byeon,<sup>a, †</sup> Sizhuo Yang,<sup>b, †</sup> Guang Yang,<sup>c</sup> Dong-Min Kim,<sup>b</sup> Venkata Sai Avvaru,<sup>a</sup>  
Tofunmi Ogunfunmi,<sup>d</sup> Mary Scott,<sup>b, d</sup> Brett A. Helms,<sup>a, b</sup> Jeffrey Urban,<sup>b, \*</sup> Haegyeom Kim<sup>a, \*</sup>

- a. Materials Sciences Division, Lawrence Berkeley National Laboratory, Berkeley, CA, USA
- b. Molecular Foundry Division, Lawrence Berkeley National Laboratory, Berkeley, CA, USA
- c. Chemical Sciences Division, Oak Ridge National Laboratory, Oak Ridge, TN, USA
- d. Materials Science and Engineering, University of California, Berkeley, CA, USA

<sup>†</sup>These authors contribute to this work equally.

\*Corresponding authors: J. U. (jjurban@lbl.gov) and H. K. (haegyumkim@lbl.gov)

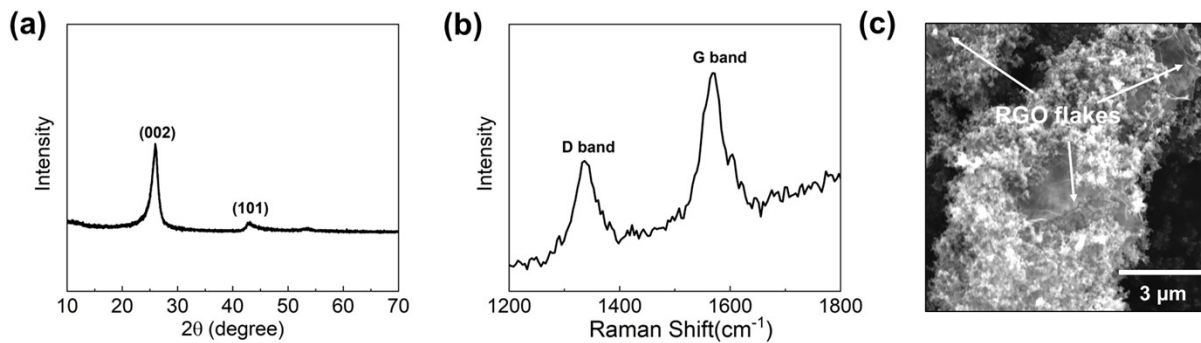

**Supplementary Figure S1.** (a) XRD pattern, (b) Raman spectrum, and (c) SEM image of 3D RGO framework.

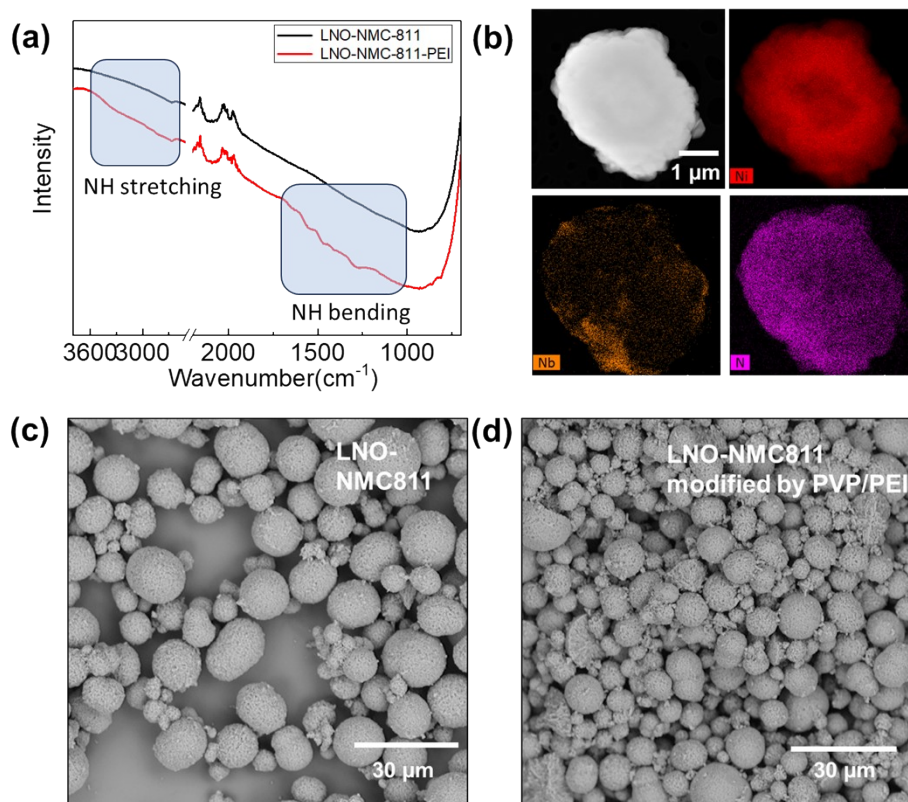

**Supplementary Figure S2.** (a) IR, (b) STEM-HAADF image and EDS elemental mappings, and (c–d) SEM images of PEI-coated pc-NMC811.

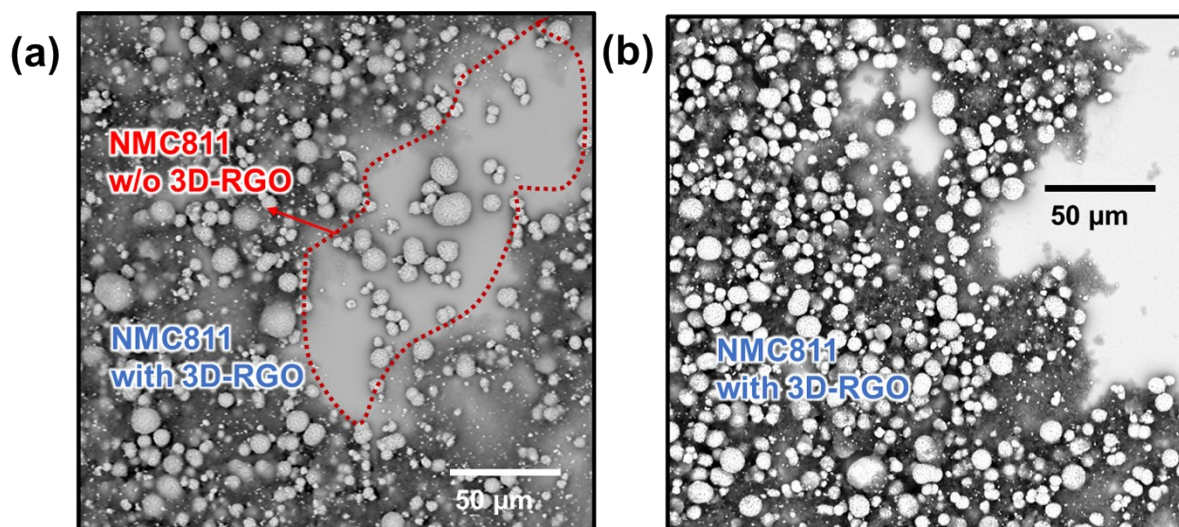

**Supplementary Figure S3.** SEM images of pc-NMC811/RGO composites (a) without and (b) with PEI coating on p

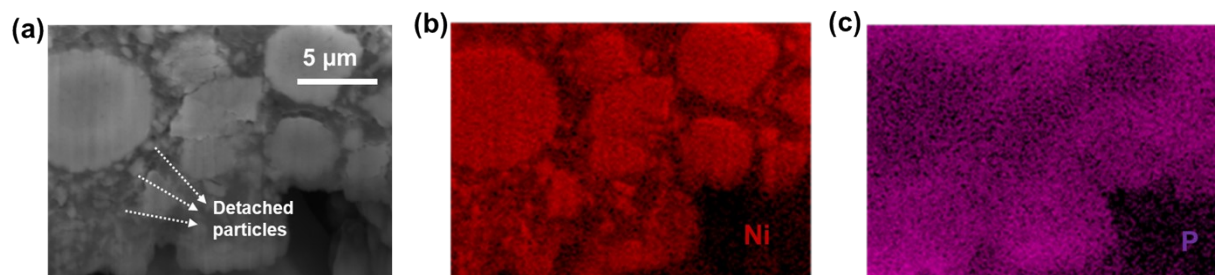

**Supplementary Figure S4.** Cross-sectional SEM images of a composite cathode consisting of pc-NMC811/RGO and LPSCI SE. (a) SEM image and EDS mapping of (b) Ni (representing pc-NMC811) and (c) P (representing LPSCI).
